# 1 Evolutionary dynamics of multiple games

2 Vandana R. Venkateswaran<sup>1</sup> and Chaitanya S. Gokhale<sup>1</sup>

3 <sup>1</sup>Research Group for Theoretical Models of Eco-evolutionary Dynamics,  
4 Department of Evolutionary Theory, Max Planck Institute for  
5 Evolutionary Biology, August Thienemann Str. 2, 24306, Plön,  
6 Germany.

7 April 16, 2018

## 8 Abstract

9 Evolutionary game theory has been successful in describing phenomena from bacterial pop-  
10 ulation dynamics to the evolution of social behavior. Interactions between individuals are  
11 usually captured by a single game. In reality, however, individuals take part in many in-  
12 teractions. Here, we include multiple games and analyze their individual and combined  
13 evolutionary dynamics. A typical assumption is that the evolutionary dynamics of individual  
14 behavior can be understood by constructing one big comprehensive interactions structure, a  
15 single big game. But if any one of the multiple games has more than two strategies, then  
16 the combined dynamics cannot be understood by looking only at individual games. Devising  
17 a method to study multiple games – where each game could have an arbitrary number of  
18 players and strategies – we provide a concise replicator equation, and analyze its resulting  
19 dynamics. Moreover, in the case of finite populations, we formulate and calculate a basic  
20 and useful property of stochasticity, fixation probability. Our results reveal that even when  
21 interactions become incredibly complex, their properties can be captured by relatively simple  
22 concepts of evolutionary game(s) theory.

## 23 Introduction

24 Evolutionary Game Theory (EGT) [von Neumann and Morgenstern, 1944, Maynard Smith  
25 and Price, 1973, Nowak, 2006, Nowak and Sigmund, 2004] has been used to study phenom-  
26 ena ranging from the dynamics of bacterial populations to the evolution of social behavior.  
27 In EGT, individuals are cast as players that interact with each other in 'games'. Games are  
28 metaphorical summaries of interactions. For example, in the classical Prisoners' Dilemma  
29 game, individuals can either cooperate or defect, and each pair-wise interaction results in a  
30 payoff for the players involved [Nowak, 2006, Nowak and May, 1992]. Over time, players that  
31 adopt a certain strategy either perform better than the average population and increase in  
32 frequency, or perform worse than the average population and decrease in frequency. Tracking  
33 the change in their frequencies over time, EGT can provide insight into the eventual fate  
34 of the strategies in a game, e.g. whether they dominate, coexist or go extinct from the  
35 population.

36 However, single games are too simplistic a model. Considerable effort has been done in  
37 making them more realistic (with interactions among multiple players and allowing players  
38 to adopt strategies from a large set [Ostrom, 1990, 2000]). However, single games fail to  
39 satisfactorily capture, for instance, humans interacting in public goods games such as climate  
40 change issues [Milinski et al., 2006]. When nations' leaders discuss strategies to improve the  
41 status of global climate, they also need to take into account the interests of the people  
42 they are representing. Thus, political leaders are playing at least two games: one with other  
43 nations and another within their own nation.

44 In lions, females defend their territory against invaders by forming a line. Some lionesses  
45 always stay at the forefront while others lag behind [Heinsohn and Parker, 1995]. Look-  
46 ing at this territory defense game in isolation, the laggards would be defined as cheaters.  
47 Interestingly, the leaders, knowing the identity of the laggards, do not employ any retali-  
48 atory strategies (such as Tit for Tat or Pavlov) [Legge, 1995]. The co-existence of the two  
49 types would most likely not be evolutionary stable. However, we see stable prides! This  
50 puzzle is solved by realizing that territory defense is only one of many games played by the  
51 lionesses. In the complete picture, there is division of labor among them, and the laggards  
52 could be playing important roles in other games such as maternal care and hunting [Boza  
53 and Számadó, 2010, Legge, 1995].

54 Lastly, a multiple games model in bacterial dynamics can be used to explain the coex-  
55 istence of avirulent 'cheaters' and virulent 'cooperators' in populations of the pathogen *S.*  
56 *typhimurium* [Dird et al., 2013]. Likewise, in *Pseudomonas fluorescens* communities, the  
57 seemingly destructive cheating cells can promote evolution of collectives [Hammerschmidt  
58 et al., 2014]. The dynamics between the microbes constituting the microbiome have been  
59 found to be non-linear lending themselves to multiplayer games [Li et al., 2015]. The com-  
60 plete interaction in the holobiont would then be a collection of multiple multiplayer games  
61 [?]. In summary, real world interactions cannot be described by single games [Tarnita et al.,  
62 2009] and as mentioned earlier, one particular use of multiple games is tackling the evolution  
63 of division of labor [Rueffler et al., 2012, Gazda et al., 2005, Wahl, 2002, Kerr et al., 2002].

64 Previous studies on multi-game dynamics (MGD) (Fig. 1) have shown that a combination  
65 of games with more than two strategies cannot be separated into its constituent single

66 game dynamics (SGD) [Hashimoto, 2006]. However, these results are restricted to two-  
 67 player games. When more players are involved, different dynamics emerge [Pacheco et al.,  
 68 2009, Gokhale and Traulsen, 2010, Peña, 2012] A complete picture of MGD, where multiple  
 69 players are involved, is lacking. If multiple players are involved, then can the MGD be  
 70 decomposed back into its constituent SGDs? If yes – the conclusions drawn from individual  
 71 games are valid. If not – it will be necessary to use MGD to obtain realistic results.

72 To answer this question, we enhance the MGD to look at combinations of multiplayer  
 73 games, and provide an analytical framework for analyzing an ensemble of games in a tractable  
 74 manner. We present a complete and general method to study multiple games with many  
 75 strategies and players, all at once (Fig. 1). When the games have more than two strategies,  
 76 we find that they cannot be separated back to their SGDs, in line with previous findings.  
 77 Interestingly, however, we find a dependency on the initial conditions (i.e., the initial fre-  
 78 quencies of each strategy). For certain initial conditions, one may still be able to capture  
 79 the SGDs from their MGD.

## 80 Model and Results

### 81 Single game dynamics (SGD)

82 Two player games with two strategies have been studied extensively, both in infinite as well  
 83 as finite populations. A game between two individuals can be represented by the following  
 84 interaction matrix,

$$\begin{matrix} & \begin{matrix} 1 & 2 \end{matrix} \\ \begin{matrix} 1 \\ 2 \end{matrix} & \begin{pmatrix} a_{1,(1,0)} & a_{1,(0,1)} \\ a_{2,(1,0)} & a_{2,(0,1)} \end{pmatrix} \end{matrix} \quad (1)$$

85 The two individuals are represented by a row and a column respectively and each can adopt  
 86 one of the two strategies 1 or 2. We write the elements of the matrix in the form  $a_{i,\alpha}$ ,  
 87 where  $i$  is the strategy of the focal player. The vector  $\alpha$  is written as  $\alpha = (\alpha_1, \alpha_2)$  where  
 88  $\alpha_1$  (number of individuals of strategy 1 in the column) and  $\alpha_2$  (number of individuals of  
 89 strategy 2 in the column), together represent the group composition. In a 3-player game with  
 90 two strategies, a payoff matrix entry, say  $a_{2,(1,1)}$ , where  $\alpha_1 = 1$  and  $\alpha_2 = 1$ , will correspond  
 91 to a focal player with strategy 2 interacting with two other players with strategies 1 and 2,  
 92 respectively.

93 The average payoff obtained from the game is the reproductive success of that strat-  
 94 egy [Maynard Smith, 1982]. This analysis has been extended to interactions having *multiple*  
 95 strategies [Wu et al., 2011] as well as *multiple* players [Broom et al., 1997, Broom, 2003].  
 96 To make our notation clear, we illustrate a payoff matrix for a multiplayer ( $d$  player) game  
 97 with two strategies as,

| No. of opposing<br>1 players | $d - 1$         | $d - 2$         | ... | $k$               | ... | 0               |
|------------------------------|-----------------|-----------------|-----|-------------------|-----|-----------------|
| 1                            | $a_{1,(d-1,0)}$ | $a_{1,(d-2,1)}$ | ... | $a_{1,(k,d-1-k)}$ | ... | $a_{1,(0,d-1)}$ |
| 2                            | $a_{2,(d-1,0)}$ | $a_{2,(d-2,1)}$ | ... | $a_{2,(k,d-1-k)}$ | ... | $a_{2,(0,d-1)}$ |

(2)

Even while extending the number of strategies, the dynamics of this complicated system can still be analyzed by the replicator dynamics [Hofbauer and Sigmund, 1998, Schuster and Sigmund, 1983]. For a  $d$  player game with  $m$  strategies, the replicator dynamics is given by a set of  $m$  differential equations

$$\dot{x}_i = x_i(f_i - \bar{f}) \quad (3)$$

98 where  $x_i$  is the frequency of strategy  $i$ , and  $f_i$  is the fitness of the strategy  $i$  (see Supplemen-  
 99 tary Information (SI) text). The average fitness of the population is given by  $\bar{f} = \sum_{j=1}^m x_j f_j$ .  
 100 This simple evolutionary game framework has been used to describe a wide range of phe-  
 101 nomena from chemical reactions of prebiotic elements to the evolution of social systems  
 102 [Komarova, 2004].

103 While this extension to multiple players and strategies is not trivially obtained [Gokhale  
 104 and Traulsen, 2011], it still belongs to the domain of a single game. To make EGT models  
 105 more realistic, interactions which have differential impacts on fitness need to be taken into  
 106 account. Therefore, we now incorporate multiple games and measure their cumulative impact  
 107 on individual fitness.

### 108 Multi-game dynamics (MGD)

109 Individuals may employ different strategies in various games (e.g., division of labor scenarios  
 110 [Wahl, 2002]) and their (average) payoffs will depend on their performance on all such games.  
 111 Switching between such socially driven games is realistic and not only a matter of theoretical  
 112 interest but has been experimentally explored as well [Wedekind and Milinski, 1996].

113 To contrast multi-game dynamics (MGD) with the previously discussed single game dy-  
 114 namics (SGD), consider a simple example of two,  $2 \times 2$  games:

$$A^1 = \begin{matrix} & \begin{matrix} A_1^1 & A_2^1 \end{matrix} \\ \begin{matrix} A_1^1 \\ A_2^1 \end{matrix} & \begin{pmatrix} a_{1,(1,0)}^1 & a_{1,(0,1)}^1 \\ a_{2,(1,0)}^1 & a_{2,(0,1)}^1 \end{pmatrix} \end{matrix} \quad A^2 = \begin{matrix} & \begin{matrix} A_1^2 & A_2^2 \end{matrix} \\ \begin{matrix} A_1^2 \\ A_2^2 \end{matrix} & \begin{pmatrix} a_{1,(1,0)}^2 & a_{1,(0,1)}^2 \\ a_{2,(1,0)}^2 & a_{2,(0,1)}^2 \end{pmatrix} \end{matrix}$$

115 Combining the strategies from the above two games results in four categories of individuals  
 116 (Fig. 2). The frequencies of the four categories are given by  $x_{11}$ ,  $x_{12}$ ,  $x_{21}$  and  $x_{22}$  where the  
 117 first and second positions (in the subscript) denote the strategies adopted in games 1 and  
 118 2, respectively (Fig. 2). For a combination of  $N$  games, in principle, each game  $j$  can be  
 119 described by a payoff matrix  $A^j$ . Each game  $j$  could be a  $d_j$  player game with  $m_j$  number  
 120 of strategies. The categorical frequencies would then be given by  $x_{i_1 i_2 \dots i_j \dots i_N}$  where  $i_j$  is the  
 121 strategy being played in game  $j$ .

The frequencies of the individual strategies for all  $N$  games can be written down as,

$$p_{j i_j} = \sum_{k=1, k \neq j}^{k=N} \sum_{i_k=1}^{m_k} x_{i_1 i_2 \dots i_j \dots i_N} \quad (4)$$

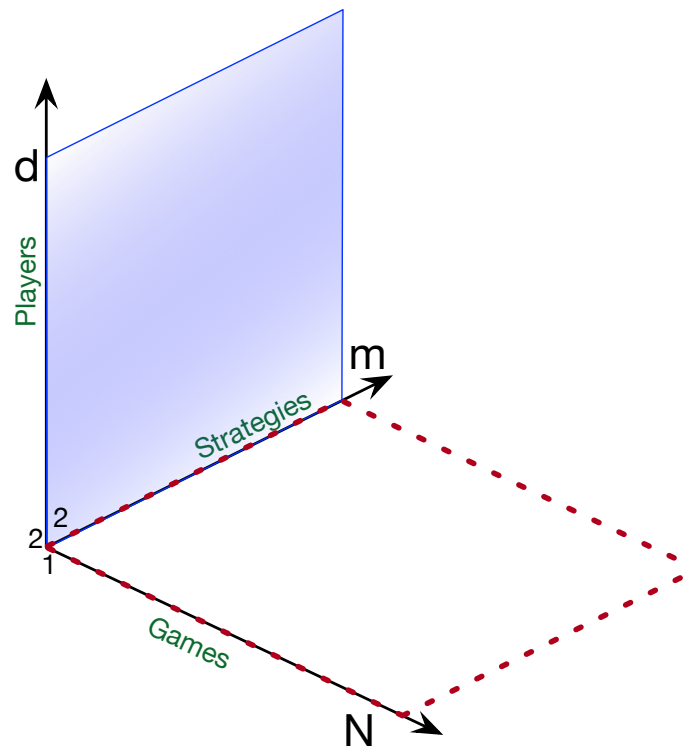

Figure 1: **Scope of this study.** Typical evolutionary game dynamics focuses on two player games with two strategies. Extensions to multiplayer games ( $d$ ) and multiple strategies ( $m$ , solid blue rectangle) expands the domain of study to public goods games and other social dilemmas. However this is still limited to a single game. Hashimoto [2006] has extended two player-multi-strategy games in a novel direction of multiple games ( $N$ , dotted red rectangle). Our work generalizes this approach and develops a method for analyzing multiple games, where each involved game could be a multiplayer (and multi-strategy) game. Thus, this approach enables us to study the entire space of multiple games ( $N$ ) with multiple strategies ( $m$ ) consisting of multiple players ( $d$ ).

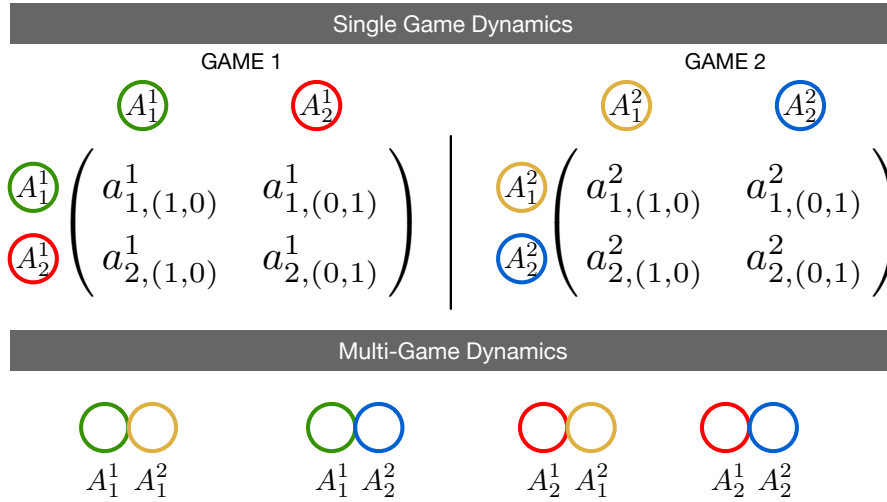

Figure 2: **From Single Game Dynamics to Multi-Game Dynamics.** The population after combination is divided into four types: playing strategy 1 in game  $A^1$  and game  $A^2$ , strategy 1 in  $A^1$  and 2 in  $A^2$ , strategy 2 in  $A^1$  and 1 in  $A^2$ . And finally, strategy 2 in  $A^1$  and  $A^2$ . Thus, we have four types of strategies,  $A_1^1 A_1^2$ ,  $A_1^1 A_2^2$ ,  $A_2^1 A_1^2$  and  $A_2^1 A_2^2$ . Their respective frequencies are  $x_{11}$ ,  $x_{12}$ ,  $x_{21}$  and  $x_{22}$ . Since there are four 'categorical types', we can project the dynamics on an  $S_4$  simplex.

Using this individual strategy frequency for a game  $j$ , the fitness of strategy  $i_j$  is given by,

$$f_{ji_j} = \sum_{|\alpha|=d_j-1} \binom{d_j-1}{\alpha} p^\alpha a_{i_j,\alpha}^j. \quad (5)$$

As before,  $\alpha_{m_j}$  is the number of strategy  $m_j$  players. Using multi-index notation, we have  $\alpha = (\alpha_1, \alpha_2, \dots, \alpha_{m_j})$  which gives us the multinomial coefficient, with the absolute value  $|\alpha| = \alpha_1 + \alpha_2 + \dots + \alpha_{m_j}$  and the power  $p^\alpha = p_{j1}^{\alpha_1} p_{j2}^{\alpha_2} \dots p_{jm_j}^{\alpha_{m_j}}$ . The average fitness of the population is given by,  $\phi_j = (\mathbf{p}\mathbf{f})_j$  (see SI text). Putting all this information together, we can write down the time evolution of all the categorical strategies as,

$$\dot{x}_{i_1 i_2 \dots i_j \dots i_N} = x_{i_1 i_2 \dots i_j \dots i_N} \left( \sum_{j=1}^N (f_{ji_j} - \phi_j) \right). \quad (6)$$

122 This system of equations is reminiscent of the replicator equation for the SGD. The summa-  
 123 tion in the MGD replicator equations is due to an assumption of additive fitness effects from  
 124 all games [Hashimoto, 2006]. In the following sections we will explore the use of this formu-  
 125 lation for multiple games where each game can have a different number of players. Through  
 126 the examples of specific cases, we aim to highlight the general principles of multiple games.

## 127 Two player game(s) with multiple strategies

128 In case of two player games with two strategies, [Cressman et al. \[2000\]](#) showed that the  
 129 SGD can be separated from the MGD. The dynamics lies on the generalized invariant  
 130 *Wright manifold* [[Hofbauer and Sigmund, 1998](#)] in the  $S_4$  simplex which is given by  $W_K =$   
 131  $\{x \in \Delta^4 \mid x_{11}x_{22} = Kx_{12}x_{21}\}$  for  $K > 0$ . All the trajectories in the simplex depicting the  
 132 MGD fall onto an attractor given by a line (ES set) on  $W_K$ . However, previous results  
 133 [[Hashimoto, 2006](#)] show that for more than two strategies, the MGD cannot be separated  
 134 even into a linear combination of the constituent SGDs unless they are on  $W_K$ . We are  
 135 clearly looking at higher dimensions and the space is dense with various manifolds. It is  
 136 important to know on which manifold the initial conditions are, for only if they start from  
 137  $W_K$ , will the system state end on  $W_K$ .

## 138 Multiplayer game(s) with multiple strategies

139 In combinations containing multiplayer games, frequency feedback between strategies is possible.  
 140 Moreover, as discussed in the beginning, an individual can take part in different  
 141 interactions. A lioness can be part of forming the defensive line (tragedy of the commons)  
 142 and hunting (stag-hunt game). Strategies in game 1 would be *Cooperator*, *Defector*, *Loner*  
 143 etc. Strategies in game 2 could be *Wing*, *Centre* and so on. Thus  $A_1^1$  need not be the same  
 144 as  $A_1^2$ . Using our framework, we can model the combined dynamics of several games that  
 145 an individual plays where each game can have completely different strategy sets.

$$A^1 = \frac{1}{2} \begin{pmatrix} 1 & 2 \\ -1 & 1 \\ 0 & 0 \end{pmatrix} \quad A^2 = \frac{1}{2} \begin{pmatrix} 11 & 12 & 22 \\ -2 & 3 & -2 \\ 0 & 0 & 0 \end{pmatrix} \quad (7)$$

146 To illustrate games with two strategies, we shall use the payoff matrices shown in (7). Here,  
 147  $A^1$  is a two player coexistence game and  $A^2$  is a three player game. In Game  $A^2$ , the values  
 148  $a_{1,(k,d-1-k)} - a_{2,(k,d-1-k)}$  and  $a_{1,(k+1,d-k)} - a_{2,(k+1,d-k)}$  have different signs for all  $k$ . Thus,  
 149 we have two interior fixed point solutions: a stable and an unstable. The exact solutions for  
 150 the two SGD's in (7) are  $q_1^* = 0.5$  and  $q_{2,1,2}^* = (0.7236, 0.2763)$ . The result of combining  
 151 these games i.e. their MGD, is shown in Fig. 3.

Next, we shall look at an example where one game, say,  $A^1$ , has three strategies. Let  $A^1$   
 to be a Rock-Paper-Scissor type game as shown in the first payoff matrix in 8.

$$A^1 = \frac{1}{2} \begin{pmatrix} 1 & 2 & 3 \\ 0 & -1 & 2 \\ 2 & 0 & -1 \\ -1 & 2 & 0 \end{pmatrix} \quad A^2 = \frac{1}{2} \begin{pmatrix} 11 & 12 & 22 \\ 10 & 1 & 5.5 \\ 4 & 10 & 3 \end{pmatrix} \quad (8)$$

152 Since the determinant of the matrix is positive, the trajectories starting from any initial  
 153 condition will converge to a unique stable equilibrium. The other game,  $A^2$ , as shown in (8)  
 154 is a three player game similar to the one used before in (7). In the SGDs of these games,

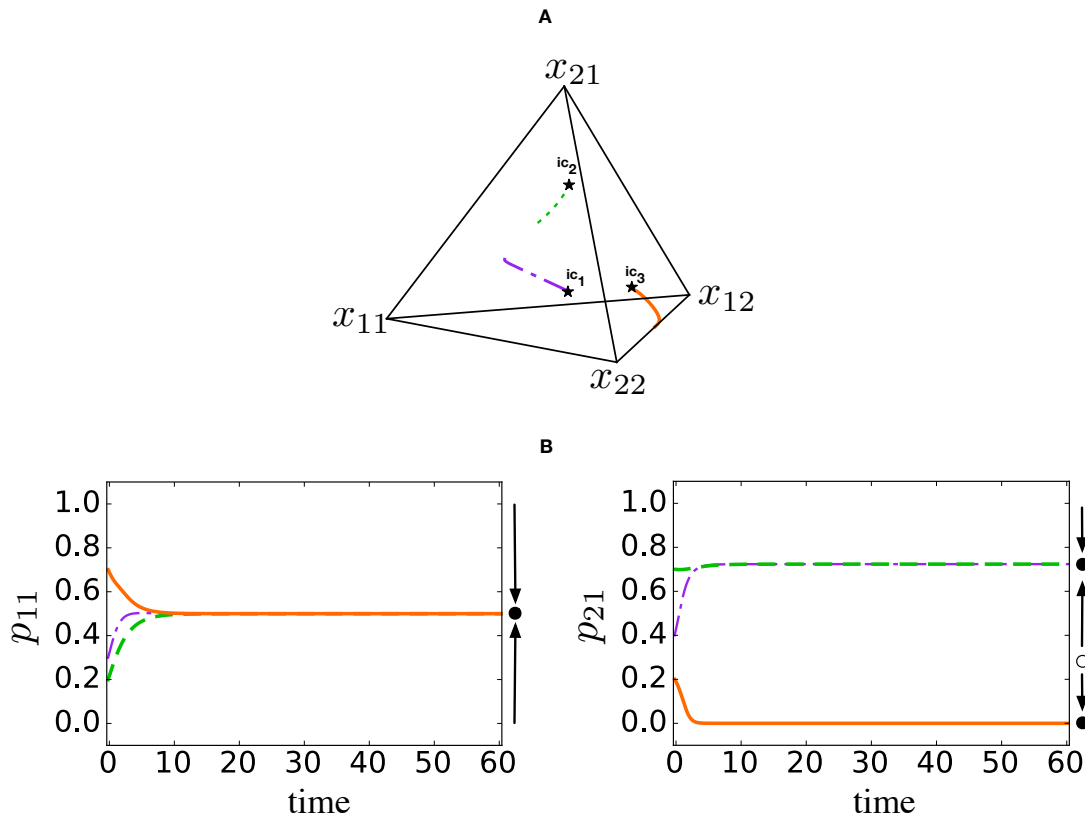

Figure 3: (A) This  $S_4$  simplex contains the Multi-Game Dynamics of the combination of the 3-player and 2-player games in (7). The vertices are made up of the four 'categorical strategies'. The asterisks depict the initial conditions ( $ic_1$ ,  $ic_2$  and  $ic_3$ ) of the three trajectories that are plotted here. (B) In the multi-game dynamics,  $p_{11}$  (playing strategy 1 in game 1) converges to  $q_1 = 0.5$  which is the equilibrium solution for strategy 1 in game 1. If we start above the unstable equilibrium solution for game 2 i.e  $q_{2_2} = 0.2763932$ , then  $p_{21}$  (playing strategy 1 in game 2) converges to  $q_{2_1} = 0.7236068$  which is the stable equilibrium solution for game 2. For trajectories that commence below the unstable equilibrium, strategy 1 goes to extinction. Clearly,  $p_{12} = 1 - p_{11}$  and  $p_{22} = 1 - p_{21}$ . The initials conditions for  $\{x_{11}, x_{12}, x_{21}$  and  $x_{22}\}$  used in these plots are :  $ic_1 = \{0.2, 0.1, 0.2, 0.5\}$ ,  $ic_2 = \{0.1, 0.1, 0.6, 0.2\}$  and  $ic_3 = \{0.1, 0.6, 0.1, 0.2\}$ .



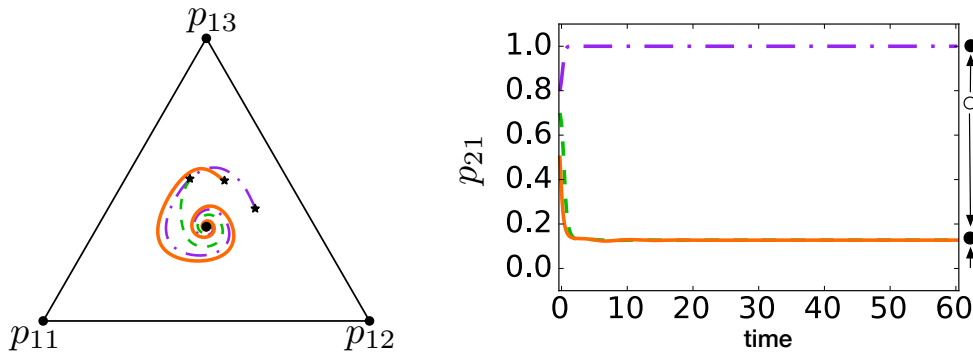

Figure 4: When there are three strategies in one game and two strategies in the other, six “categorical types” are possible in their multi-game dynamics. The MGD will be on an  $S_6$  simplex. Avoiding a five dimensional figure, we retrieve the distribution of frequencies of strategies in the SGDs from the MGD which is what we require to compare the SGDs and MGDs. The asterisks in the triangular  $S_3$  simplex denote the positions from where the trajectories begin (initial conditions). Retrieving the distribution of frequencies of strategies in game  $A^1$ , all trajectories converge to the equilibrium solution  $\mathbf{q}_1 = (1/3, 1/3, 1/3)$  and in game  $A^2$ , the trajectories that begin from below the unstable equilibrium  $\mathbf{q}_{2_2} = 0.740$  converge to the stable equilibrium solution  $\mathbf{q}_{2_1} = 0.127$ . The initials conditions used for  $\{x_{11}, x_{12}, x_{21}, x_{22}, x_{31}$  and  $x_{32}\}$  are :  $ic_1 = \{0.3, 0.1, 0.1, 0.05, 0.4, 0.05\}$ ,  $ic_2 = \{0.4, 0.1, 0.2, 0.1, 0.1, 0.1\}$  and  $ic_3 = \{0.2, 0.3, 0.1, 0.1, 0.2, 0.1\}$ .

155 the interior solution for Game  $A^1$  is  $\mathbf{q}_1 = (1/3, 1/3, 1/3)$ . For Game  $A^2$ , the equilibrium  
 156 solutions are  $\mathbf{q}_{2_1} = 0.127$  (stable) and  $\mathbf{q}_{2_2} = 0.740$  (unstable). The outcomes of their MGD  
 157 will be on an  $S_6$  simplex. Since it is not possible to show this simplex, the importance of  
 158 using  $p_{ji}$  is clear as we use these now to compare the MGD with their SGDs. The projections  
 159 are as shown in Fig. 4.

$$A^1 = \begin{matrix} & \begin{matrix} 1 & 2 & 3 \end{matrix} \\ \begin{matrix} 1 \\ 2 \\ 3 \end{matrix} & \begin{pmatrix} -1 & 10 & -10 \\ -6 & -1 & 6 \\ 2 & -2 & -1 \end{pmatrix} \end{matrix} \quad (9)$$

160

$$A^2 = \begin{matrix} & \begin{matrix} 111 & 112 & 113 & 113 & 122 & 123 & 133 & 222 & 233 & 333 \end{matrix} \\ \begin{matrix} 1 \\ 2 \\ 3 \end{matrix} & \begin{pmatrix} -9.30 & 3.83 & 3.86 & -1.03 & -1.00 & -0.96 & 0.10 & 0.33 & 0.16 & 0.20 \\ 0.10 & -1.03 & 0.13 & 3.83 & -1.00 & 0.16 & -9.30 & 4.06 & -0.96 & 0.2 \\ 0 & 0 & 0 & 0 & 0 & 0 & 0 & 0.20 & 0 & 0 \end{pmatrix} \end{matrix} \quad (10)$$

161 Finally, we shall illustrate a case of having three strategies in both games (shown in matrices  
 162 9 and 10).  $A^1$  is a Rock-Paper-Scissor game like the one discussed in the previous example.  
 163  $A^2$  is a 4-player three strategy game used previously in Gokhale and Traulsen [2010]. In the

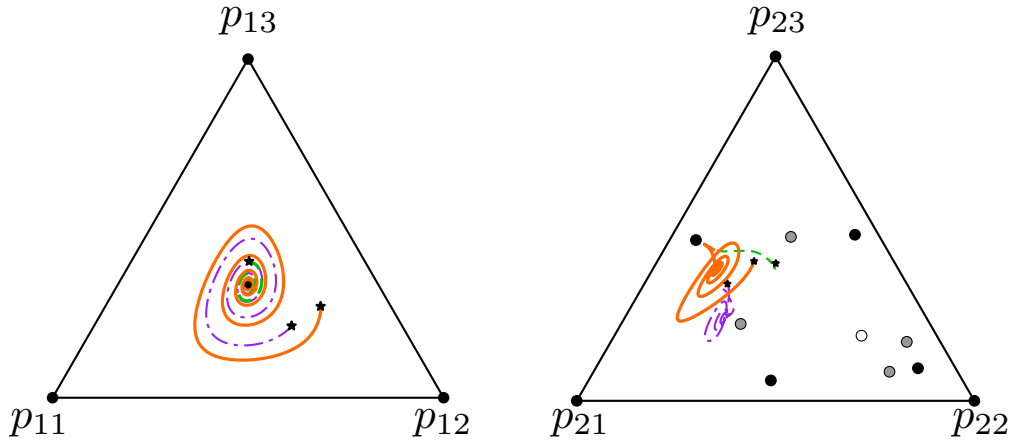

Figure 5: When both games contain three strategies nine categorical types are possible. The MGD would be in an  $S_9$  simplex. As discussed in Fig. 4, since we avoid an eight dimensional figure, we retrieve the distribution of frequencies of strategies in the SGDs from the MGD which is what we require to compare the SGDs and MGDs. The asterisks in the triangular  $S_3$  simplex denote the initial conditions. The triangular markers are the final position of the trajectories. The black, grey and white solid circles are the stable, saddle and unstable interior equilibrium solutions in the SGDs. While retrieving the distribution of frequencies of strategies in the SGDs from the MGD, we see that not all trajectories converge to the equilibrium solutions of the SGDs. When both games have more than two strategies, initial conditions matter. For few initial conditions, we can decompose the multi-game into its constituent games and for others, we cannot. The initials conditions used for  $x_{11}, x_{12}, x_{13}, x_{21}, x_{22}, x_{23}, x_{31}, x_{32}$  and  $x_{33}$  are :  $ic_1 = \{0.01, 0.166, 0.038, 0.002, 0.176, 0.102, 0.3251, 0.111, 0.070\}$ ,  $ic_2 = \{0.2, 0.1, 0.1, 0.1, 0.1, 0.1, 0.1, 0.1, 0.1\}$  and  $ic_3 = \{0.176, 0.066, 0.024, 0.002, 0.176, 0.002, 0.225, 0.111, 0.218\}$ .

164 SGDs of the individual games,  $A^1$  has a stable equilibrium solution  $\mathbf{q}_1 = (1/3, 1/3, 1/3)$  and  
 165 since  $A^2$  is a 4-player three strategy game, it has  $(d-1)^{(n-1)} = 3^2 = 9$  interior equilibrium  
 166 solutions : four stable, one unstable and four saddle points. The resulting Multi-Game  
 167 Dynamics is shown in Fig. 5.

168 For multiplayer games, we perform a similar study as in two player games. The MGDs can  
 169 be separated into SGDs if both the games have only two strategies (Fig. 3). The expression  
 170 for  $W_K$  though, would have higher order terms. Thus, the attractor may no longer be a line,  
 171 but instead a curve  $W_K$  in a higher dimensional space. We performed an analysis where only  
 172 one game has two strategies (Fig. 4) and here too the MGDs can be separated into their  
 173 integral SGDs. However, while considering more than two strategies in both games (Fig. 5),  
 174 the MGDs cannot always be trivially separated into their constituent SGDs. As in Hashimoto  
 175 [2006], it becomes important to look at the initial conditions. Some trajectories converge  
 176 to the fixed point solutions of the SGDs, while many others do not. Table 1 provided in the

177 appendix contains a condensed description of the effect of initial conditions.

## 178 Finite population

179 Evolutionary dynamics in finite populations has the potential of having qualitatively different  
 180 dynamics than their deterministic analogues [Nowak et al., 2004]. In finite populations the  
 181 size of the population controls the balance between selection and drift with small populations  
 182 showing higher levels of stochasticity.

183 We use a birth-death Moran process to model a finite population of size  $Z$  in our framework  
 184 [Nowak et al., 2004, Traulsen and Hauert, 2009]. An individual is chosen (proportional to  
 185 its fitness) to reproduce an identical offspring. Another individual is chosen randomly for  
 186 death. Thus the total population size remains constant. Fitness, as measured before, is a  
 187 function of the average payoffs. Besides the population size, we can control the effect of the  
 188 game on the fitness via a payoff to fitness mapping. The mapping could be a linear function  
 189  $f = 1 - w + w\pi$  where  $w$  is the selection intensity [Nowak, 2006]. If  $w = 0$ , selection is  
 190 neutral whereas for  $w = 1$  selection is strong and the payoff determines the fitness completely.  
 191 However, since negative fitnesses in this framework are meaningless, there are restrictions  
 192 on the range of  $w$ . Alternatively, to avoid this restriction, we can map the payoffs to fitness  
 193 using an exponential function  $f = e^{w\pi}$  [Traulsen et al., 2008]. The fixation probability of  
 194 strategy 1 in a SGD for a  $d$ -player game, under weak selection, is given by [Gokhale and  
 195 Traulsen, 2010],

$$\rho_1 \approx \frac{1}{Z} + \frac{w}{Z^2} \sum_{m=1}^{Z-1} \sum_{i=1}^m (\pi_1 - \pi_2). \quad (11)$$

196 where  $\pi_i$  is the average payoff of strategy  $i$ . We have extended this to multiple games. In  
 197 order to do this, we define what we mean by fixation probability in multiple games. The  
 198 strategies in a multiple game are the categorical ones. For instance, a two game system with  
 199 each game containing two strategies, has four categorical strategies as shown in Fig. 2. In a  
 200 population of size  $Z$  playing  $N$  multi-strategy  $d$ -player games, if  $\gamma$  is the number of individuals  
 201 of the categorical type  $A_{i_1}^1 A_{i_2}^2 A_{i_3}^3 \dots A_{i_N}^N$  on an edge, then the number of individuals of type  
 202  $A_{h_1}^1 A_{h_2}^2 A_{h_3}^3 \dots A_{h_N}^N$  on the other vertex of that edge will be  $Z - \gamma$ . The average payoff is  
 203 given by (see SI text),

$$\pi_{j i_j} = \sum_{|k|=d_j-1} \frac{\binom{p_j i_j - 1}{k_{i_j}} \prod_{n=1, n \neq i_j}^{m_j} \binom{p_j n}{k_n}}{\binom{Z-1}{d_j-1}} a_{i_j, k}^j. \quad (12)$$

204 The above expression is utilized to calculate the fitnesses of the categorical types  $F_{i_1 i_2 i_3 \dots i_N}$   
 205 and  $F_{h_1 h_2 h_3 \dots h_N}$  (see SI text) and using these expressions, the fixation probability of type  
 206  $A_{i_1}^1 A_{i_2}^2 A_{i_3}^3 \dots A_{i_N}^N$  fixating in population of  $A_{h_1}^1 A_{h_2}^2 A_{h_3}^3 \dots A_{h_N}^N$  becomes equal to,

$$\rho_{A_{i_1}^1 A_{i_2}^2 A_{i_3}^3 \dots A_{i_N}^N, A_{h_1}^1 A_{h_2}^2 A_{h_3}^3 \dots A_{h_N}^N} = \frac{1}{1 + \sum_{m=1}^{Z-1} \prod_{\gamma=1}^m \frac{F_{h_1 h_2 h_3 \dots h_N}}{F_{i_1 i_2 i_3 \dots i_N}}}. \quad (13)$$

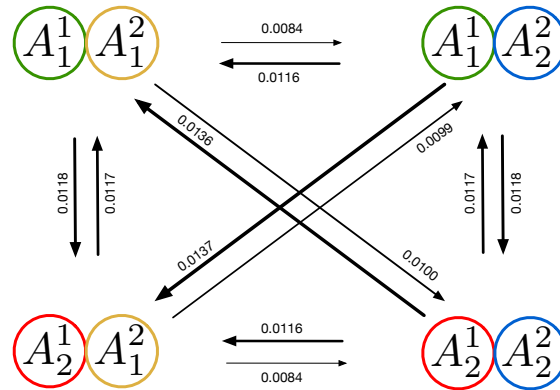

Figure 6: Figure showing the direction of selection and strength according to fixation probabilities between the vertices in a tetrahedron (which contains the MGD of games shown in matrices 7) shown in Fig. 3. The width of the arrows correlate with the magnitudes of the fixation probabilities. Here selection intensity  $w = 0.01$  and population size  $Z = 100$ . It has been assumed that both the games have the same selection intensity and hence the average payoffs have been added first and then the mapping has been performed. For different mappings for the two games, see SI. (Result I). For the edges where one of the games does not change (e.g.  $A_1^1, A_1^2 \rightleftharpoons A_1^1, A_2^2$ ), only one of the game (here game 2) matters and hence the fixation probabilities are the same as if *only* one game.

207 We make pairwise comparisons between all categorical types (all the edges of the  $S_4$  simplex in Fig. 2 containing the MGD). Using these comparative fixation probabilities we can  
 208 determine the flow of the dynamics over pure strategies as shown in Fig. 6 (see SI text).  
 209

210 Instead of merely looking at the fixating probabilities of certain types or strategies in a  
 211 game, we have expanded the method for analyzing the ‘categorical types’ in the multi-game  
 212 dynamics (see SI text). Therefore, one can determine the dynamics of entities playing a  
 213 combination of different roles (strategies) in various interactions (games).

## 214 Conclusion

215 Nature is composed on many interactions (games). The games consist of different players  
 216 and strategies. And one player in its time plays many parts (in various games).

217 We devised a method to combine the various multiplayer multi-strategy games that in-  
 218 dividuals play at a certain period to incorporate the observed complexity while modelling  
 219 games that biological entities play; to advance further into creating more realistic models.  
 220 Taking more than two strategies into account represents situations such as the three strategy  
 221 rock-paper-scissor like games that *E.coli* play in addition to a public goods game [Wakano  
 222 et al., 2009, Kerr et al., 2002].

223 While biological and social analogies of multiplayer evolutionary games can be found  
 224 aplenty, the case for considering multiple games is strong. The gut microbiota is a complex

225 system which is capable of showing a variety of stable states, often a dynamic stability  
226 [Li et al., 2015, Abedon, 2008]. The different microbes within the gut community definitely  
227 interact in a variety of ways within themselves but each also interacts with the host in a unique  
228 manner. Within species and between species interactions, together, have the potential to  
229 dictate the evolutionary course of all involved species [?]. These interactions can certainly be  
230 interpreted as multiple games, each with a number of strategies and (immensely) multiplayer  
231 games. On the population genetics level, as an extension to the work by Traulsen and Reed  
232 [2012], multiple games and multi-strategies can be seen as multiple loci with several alleles.  
233 The case for two loci and two strategy games has been investigated by Cressman et al.  
234 [2000] while the three strategy games by Hashimoto [2006]. Since we consider more than  
235 two players, our work can be extended to investigate polyploidy as well [Han et al., 2012].

236 In a nutshell, from the analyses that we performed, the outcomes from multiplayer two  
237 strategy games are similar to Cressman et al. [2000]'s results where the MGD can be charac-  
238 terized by the separate analysis of the individual games. However, when the games have at  
239 least three pure strategies, different dynamics emerge. For such cases, a fully comprehensive  
240 study of the initial conditions is a potential future work. It would be interesting to see what  
241 fraction of them end up converging to the equilibrium solutions of the individual games.  
242 Even though complicated dynamics can still be captured by the relatively simple replicator  
243 like equations, vast domains in the multiple games space remain unexplored.

244 **APPENDIX**

| Games                                           | Initial conditions rounded up to 10 decimal places | Initial conditions rounded up to 100 decimal places |
|-------------------------------------------------|----------------------------------------------------|-----------------------------------------------------|
| $(2 \times 2) + (2 \times 2)$                   | All trajectories converged                         | All trajectories converged                          |
| $(3 \times 3) + (3 \times 3)$                   | All trajectories converged                         | 0.46% of total trajectories converged               |
| $(2 \times 2) + (2 \times 2 \times 2)$          | All trajectories converged                         | All trajectories converged                          |
| $(3 \times 3) + (2 \times 2 \times 2)$          | All trajectories converged                         | All trajectories converged                          |
| $(3 \times 3) + (3 \times 3 \times 3 \times 3)$ | No trajectory converged                            | No trajectory converged                             |

Table 1: When all games involved consist of more than two strategies, initial conditions of the trajectories matter. While retrieving the SGDs from the MGDs, only a fraction of the trajectories converge to the fixed point solutions of the individual SGDs i.e.  $p_{11} = q_1$  and  $p_{21} = q_2$  only for certain initial conditions. In other words, while extracting the SGDs from the MGDs, they do not behave like the individual games for all initial conditions and therefore, we cannot decompose the MGD into its inherent games. To analyze the sensitivity of initial conditions, they were rounded up to 10 decimal places, first. Later, we allowed up to 100 decimal places. The two player games used in this table are from [Cressman et al. \[2000\]](#) and [Hashimoto \[2006\]](#) and the multiplayer games are the ones discussed in the main article of this paper. In all examples involving R-P-S games, the check for convergence to the internal equilibrium  $0.\overline{33}$  was done by rounding it up to four decimal places i.e. 0.3333.

245 **SUPPORTING INFORMATION**

246 **1 Infinite population**

247 **1.1 Single Game Dynamics (SGD)**

248 **A two player replicator approach**

249 Consider a  $2 \times 2$  (two player two strategy) payoff matrix (14) : There are two players and  
 250 each of them can adopt two strategies The two types of strategies they could employ are 1  
 251 and 2 and their respective frequencies are  $x_1$  and  $x_2$ .

$$\begin{matrix} & \begin{matrix} 1 & 2 \end{matrix} \\ \begin{matrix} 1 \\ 2 \end{matrix} & \begin{pmatrix} a_{1,(1,0)} & a_{1,(0,1)} \\ a_{2,(1,0)} & a_{2,(0,1)} \end{pmatrix} \end{matrix} \quad (14)$$

252 In matrix 14, we write the elements in the form  $a_{i,\alpha}$ , where  $i$  is the strategy of the focal  
 253 player.  $\alpha$  (using multiindices notation) is a vector written as  $\alpha = (\alpha_1, \alpha_2)$ .  $\alpha_1$  and  $\alpha_2$   
 254 together represent the group composition. The average payoffs of the two strategies are

255 given by  $f_1 = a_{1,(1,0)}x_1 + a_{1,(0,1)}x_2$  and  $f_2 = a_{2,(1,0)}x_1 + a_{2,(0,1)}x_2$ . The replicator equation  
 256 Eq. (15) [Hofbauer and Sigmund, 1998, Nowak, 2006] describes the change in frequency  $x_i$   
 257 of strategy  $i$  over time.

$$\dot{x}_i = x_i[(f_i - \phi)] \quad (15)$$

258 where  $f_i$  is the fitness of strategy  $i$  and  $\phi$  is the average fitness. For an infinitely large  
 259 population size we have  $x_1 = x$ ,  $x_2 = 1 - x$ . Thus the replicator equation for the change in  
 260 the frequency of strategy 1 is,

$$\begin{aligned} \dot{x} &= x(1-x)(f_1 - f_2) \\ &= x(1-x)[(a_{1,(1,0)} - a_{1,(0,1)} - a_{2,(1,0)} + a_{2,(0,1)})x + a_{2,(1,0)} - a_{2,(0,1)}]. \end{aligned} \quad (16)$$

261 Apart from the trivial fixed points ( $x = 0$  and  $x = 1$ ), there is an internal equilibrium given  
 262 by,

$$x^* = \frac{a_{2,(0,1)} - a_{2,(1,0)}}{a_{1,(1,0)} - a_{1,(0,1)} - a_{2,(1,0)} + a_{2,(0,1)}}. \quad (17)$$

### 263 Multiplayer games

264 We now extend the dynamics to multiplayer games [Gokhale and Traulsen, 2014]. The payoff  
 265 matrix (18), represents a three player ( $d = 3$ ) two strategy ( $n = 2$ ) game; a  $2 \times 2 \times 2$  game.  
 266

$$\begin{array}{ccc} & 11 & 12 & 22 \\ \begin{array}{c} 1 \\ 2 \end{array} & \begin{pmatrix} a_{1,(2,0)} & a_{1,(1,1)} & a_{1,(0,2)} \\ a_{2,(2,0)} & a_{2,(1,1)} & a_{2,(0,2)} \end{pmatrix} \end{array} \quad (18)$$

267 The rows correspond to the focal player. Focal player interacting with two other players,  
 268 both with strategy 1 will receive a payoff  $a_{1,(2,0)}$ . While interacting with one strategy 1  
 269 player and another strategy 2 player, he will get  $a_{1,(1,1)}$ . Interacting with two other strategy  
 270 2 individuals, the payoff is equal to  $a_{1,(0,2)}$ . Assuming that the order of players does not  
 271 matter, the average payoffs (or in this case, the fitnesses) will be,

$$\begin{aligned} f_1 &= x^2 a_{1,(2,0)} + 2x(1-x)a_{1,(1,1)} + (1-x)^2 a_{1,(0,2)} \\ f_2 &= x^2 a_{2,(2,0)} + 2x(1-x)a_{2,(1,1)} + (1-x)^2 a_{2,(0,2)}. \end{aligned} \quad (19)$$

272 The replicator equation in this case is given by,

$$\begin{aligned} \dot{x} &= x(1-x)((a_{1,(0,2)} - 2a_{1,(1,1)} + a_{1,(2,0)} - a_{2,(0,2)} + 2a_{2,(1,1)} - a_{2,(2,0)})x^2 \\ &\quad + (-a_{1,(0,2)} + a_{1,(1,1)} + a_{2,(0,2)} - a_{2,(1,1)})2x + a_{1,(0,2)} - a_{2,(0,2)}. \end{aligned} \quad (20)$$

273 The quadratic  $x^2$  term in Eq. (20) can give rise to a maximum of two interior fixed points. In  
 274 general, for a  $d$ -player two strategy game, the replicator equation can result in  $d - 1$  interior  
 275 fixed points (maximum). For an  $n$  strategy  $d$ -player game, the maximum number of internal  
 276 equilibria is  $(d - 1)^{(n-1)}$  as shown in Gokhale and Traulsen [2010].

## 277 1.2 Multi Game Dynamics (MGD)

### 278 Linear combination of two $2 \times 2$ games

279 To start looking into the dynamics of combinations of games i.e. Multi Game Dynamics  
 280 (MGD) in contrast with the Single Game Dynamics (SGD), consider the example: two  
 281 games with two strategies in each. Let the payoff matrix of Game 1 and Game 2 be,

$$A^1 = \begin{matrix} & A_1^1 & A_2^1 \\ A_1^1 & \begin{pmatrix} a_{1,(1,0)}^1 & a_{1,(0,1)}^1 \\ a_{2,(1,0)}^1 & a_{2,(0,1)}^1 \end{pmatrix} & \end{matrix} \quad A^2 = \begin{matrix} & A_1^2 & A_2^2 \\ A_1^2 & \begin{pmatrix} a_{1,(1,0)}^2 & a_{1,(0,1)}^2 \\ a_{2,(1,0)}^2 & a_{2,(0,1)}^2 \end{pmatrix} & \end{matrix}$$

282 The individuals can be partitioned into four classes. Individuals playing strategy 1 in game  
 283  $A^1$  and game  $A^2$ , strategy 1 in  $A^1$  and 2 in  $A^2$ , strategy 2 in  $A^1$  and 1 in  $A^2$ , and strategy  
 284 2 in  $A^1$  and  $A^2$ . So, there are four types of strategies,  $A_1^1 A_1^2$ ,  $A_1^1 A_2^2$ ,  $A_2^1 A_1^2$  and  $A_2^1 A_2^2$ . We  
 285 refer to them as "categorical types". Their respective frequencies are written as  $x_{11}$ ,  $x_{12}$ ,  
 286  $x_{21}$  and  $x_{22}$ . We shall now use a new notation,  $p_{i,j}$  or playing strategy  $i_j$  in game  $j$ , which  
 287 is just a variable transformation that can be written as (here,  $i_j \in \{1, 2\}$  and  $j \in \{1, 2\}$ ),

$$\begin{aligned} p_{11} &= x_{11} + x_{12} \\ p_{12} &= x_{21} + x_{22} \\ p_{21} &= x_{11} + x_{21} \\ p_{22} &= x_{12} + x_{22}. \end{aligned} \tag{21}$$

288 The fitnesses for playing strategy  $i_j$  in game  $j$  can be written out as,

$$\begin{aligned} f_{11} &= x_{11} a_{1,(1,0)}^1 + x_{12} a_{1,(1,0)}^1 + x_{21} a_{1,(0,1)}^1 + x_{22} a_{1,(0,1)}^1 \\ f_{12} &= x_{11} a_{2,(1,0)}^1 + x_{12} a_{2,(1,0)}^1 + x_{21} a_{2,(0,1)}^1 + x_{22} a_{2,(0,1)}^1 \\ f_{21} &= x_{11} a_{1,(1,0)}^2 + x_{12} a_{1,(0,1)}^2 + x_{21} a_{1,(1,0)}^2 + x_{22} a_{1,(0,1)}^2 \\ f_{22} &= x_{11} a_{2,(1,0)}^2 + x_{12} a_{2,(0,1)}^2 + x_{21} a_{2,(1,0)}^2 + x_{22} a_{2,(0,1)}^2. \end{aligned} \tag{22}$$

289 A crucial assumption here is that the effective average payoff is a linear composite of the  
 290 constituent games. The replicator dynamics will be given by the following set of coupled  
 291 different differential equations

$$\begin{aligned} \dot{x}_{11} &= x_{11}[(f_{11} + f_{21}) - \phi] \\ \dot{x}_{12} &= x_{12}[(f_{11} + f_{22}) - \phi] \\ \dot{x}_{21} &= x_{21}[(f_{12} + f_{21}) - \phi] \\ \dot{x}_{22} &= x_{22}[(f_{12} + f_{22}) - \phi]. \end{aligned} \tag{23}$$



292 The average fitness  $\phi$  is given by,

$$\begin{aligned}\phi &= x_{11}(f_{11} + f_{21}) + x_{12}(f_{11} + f_{22}) + x_{21}(f_{12} + f_{21}) + x_{22}(f_{12} + f_{22}) \\ &= f_{11}(x_{11} + x_{12}) + f_{12}(x_{21} + x_{22}) + f_{21}(x_{11} + x_{21}) + f_{22}(x_{12} + x_{22}) \\ &= f_{11} p_{11} + f_{12} p_{12} + f_{21} p_{21} + f_{22} p_{22}.\end{aligned}\quad (24)$$

## 293 2 Finite population

### 294 2.1 Single game dynamics

295 In a population of size  $Z$  consisting of strategy 1 and 2 players, the probability that one of  
296 the strategies, say 1, fixes, is given by the fixation probability  $\rho_1$ . An individual is chosen  
297 proportional to its fitness to reproduce an identical offspring. Another individual is chosen  
298 randomly and discarded from the group. Therefore, the group size is kept at a constant value  
299  $Z$ . Fitness of a strategy  $s$  can be a linear function of its average payoff  $\pi_s$  i.e  $f_s = 1 - w + w\pi_s$ .  
300 In a population that has  $i$  strategy 1 players, the fitnesses can be used to calculate the  
301 transition probabilities  $T_i^+$  and  $T_i^-$  for the number of type 1 players to increase and decrease  
302 by one, respectively.

$$\begin{aligned}T_i^+ &= \frac{if_1}{if_1 + (Z-1)f_2} \frac{Z-i}{Z} \\ T_i^- &= \frac{(Z-i)f_2}{if_1 + (Z-1)f_2} \frac{i}{Z}.\end{aligned}\quad (25)$$

303 With probability  $1 - T_i^+ - T_i^-$  the system does not change. Using the transition probabilities,  
304 the fixation probability can be calculated [Nowak, 2006, Traulsen and Hauert, 2009] to be,

$$\rho_1 = \frac{1}{1 + \sum_{m=1}^{Z-1} \prod_{i=1}^m \frac{T_i^-}{T_i^+}}.\quad (26)$$

305 Since  $\frac{T_i^-}{T_i^+} = \frac{f_2}{f_1} = \frac{1-w+w\pi_2}{1-w+w\pi_1} \approx 1 - w(\pi_1 - \pi_2)$  for selection intensity  $w \ll 1$  i.e. weak  
306 selection. Therefore,

$$\rho_1 \approx \frac{1}{1 + \sum_{m=1}^{Z-1} \prod_{i=1}^m (1 - w(\pi_1 - \pi_2))}\quad (27)$$

307 For a  $d$ -player game, the payoffs are obtained using a hypergeometric distribution given by,

$$H(k, d; i, Z) = \frac{\binom{i-1}{k} \binom{Z-i}{d-1-k}}{\binom{Z-1}{d-1}}.\quad (28)$$

308 Thus,

$$\begin{aligned}\pi_1 &= \sum_{k=0}^{d-1} \frac{\binom{i-1}{k} \binom{Z-i}{d-1-k}}{\binom{Z-1}{d-1}} a_{1,\alpha} \\ \pi_2 &= \sum_{k=0}^{d-1} \frac{\binom{i}{k} \binom{Z-i-1}{d-1-k}}{\binom{Z-1}{d-1}} a_{2,\alpha}.\end{aligned}\quad (29)$$

309 Maintaining weak selection, then from [Gokhale and Traulsen, 2010] we have,

$$\rho_1 \approx \frac{1}{Z} + \frac{w}{Z^2} \sum_{m=1}^{Z-1} \sum_{i=1}^m (\pi_1 - \pi_2). \quad (30)$$

## 310 2.2 Multiple game dynamics

311 We begin with the same example that was used to explain the combination of two 2-player  
 312 games and use the same notations for a finite population of size  $Z$ . The population consists  
 313 of individuals of four types :  $A_1^1 A_1^2$ ,  $A_1^1 A_2^2$ ,  $A_2^1 A_1^2$  and  $A_2^1 A_2^2$ . The combined dynamics  
 314 results in an  $S_4$  simplex. We perform pairwise comparisons for all the edges of the simplex.  
 315 On a particular edge, only the two vertex strategies are present. Let us start with the edge  
 316 containing  $x_{11}$  and  $x_{12}$  vertices. If there are  $\gamma_{11}$  individuals playing strategy  $A_1^1 A_1^2$ , then there  
 317 are  $\gamma_{12} = Z - \gamma_{11}$  individuals of type  $A_1^1 A_2^2$ . The number of  $A_2^1 A_1^2$  and  $A_2^1 A_2^2$  individuals i.e.  
 318  $\gamma_{21}$  and  $\gamma_{22}$  is zero. In the individual games, the number of players adopting strategy  $i_j$  in a  
 319 game  $j$  is given by  $p_{ji_j}$ . Since we are looking at the edge with  $A_1^1 A_1^2$  and  $A_1^1 A_2^2$  individuals,  
 320 we have

$$\begin{aligned} p_{11} &= \gamma_{11} + \gamma_{12} = Z \\ p_{12} &= \gamma_{21} + \gamma_{22} = 0 \\ p_{21} &= \gamma_{11} + \gamma_{21} = \gamma_{11} \\ p_{22} &= \gamma_{12} + \gamma_{22} = Z - \gamma_{11}. \end{aligned} \quad (31)$$

321 In contrast to the binomial distribution which is used for infinite populations where the  
 322 draws can be considered independent, the hypergeometric distribution was used for sampling  
 323 without replacement in the case of finite populations [Hauert et al., 2007, Gokhale and  
 324 Traulsen, 2010]. For infinite population, we used the multinomial distribution to calculate  
 325 the average payoffs for a combination of  $N$  multiplayer games in an infinite population size.  
 326 Therefore, for finite populations, we shall use the multivariate hypergeometric distribution.  
 327 For a population of size  $Z$  containing  $\gamma_{11}$  type  $A_1^1 A_1^2$  and  $Z - \gamma_{11}$  type  $A_1^1 A_2^2$  individuals,  
 328 the average payoffs  $\pi_{ji_j}$  for playing strategy  $i_j$  in game  $j$  (in our example,  $i_j \in \{1, 2\}$  and  
 329  $j \in \{1, 2\}$ ) are

$$\begin{aligned} \pi_{11} &= \sum_{|k|=d_1-1} \frac{\binom{p_{11}-1}{k_1} \binom{p_{12}}{k_2}}{\binom{Z-1}{d_1-1}} a_{1,k}^1 \\ \pi_{12} &= \sum_{|k|=d_1-1} \frac{\binom{p_{11}}{k_1} \binom{p_{12}-1}{k_2}}{\binom{Z-1}{d_1-1}} a_{2,k}^1 \\ \pi_{21} &= \sum_{|k|=d_2-1} \frac{\binom{p_{21}-1}{k_1} \binom{p_{22}}{k_2}}{\binom{Z-1}{d_2-1}} a_{1,k}^2 \\ \pi_{22} &= \sum_{|k|=d_2-1} \frac{\binom{p_{21}}{k_1} \binom{p_{22}-1}{k_2}}{\binom{Z-1}{d_2-1}} a_{2,k}^2. \end{aligned} \quad (32)$$

330 In general, for  $N$  multi-strategy  $d$ -player games,

$$\pi_{ji_j} = \sum_{|k|=d_j-1} \frac{\binom{p_{ji_j}-1}{k_{i_j}} \prod_{n=1, n \neq i_j}^m \binom{p_{jn}}{k_n}}{\binom{Z-1}{d_j-1}} a_{i_j, k}^j. \quad (33)$$

331 We can calculate the fitnesses using linear or exponential mapping. If  $w_j$  is the intensity  
332 of selection in game  $j$ , then

$$f_{ji_j} = \begin{cases} 1 - w_j + w_j p_{ji_j} & \text{for linear mapping} \\ e^{w_j p_{ji_j}} & \text{for exponential mapping.} \end{cases} \quad (34)$$

333 Thus, in the combined dynamics, the fitness (assuming it to be additive) of type  $A_{i_1}^1 A_{i_2}^2 A_{i_3}^3 \dots A_{i_N}^N$   
334 is

$$F_{i_1 i_2 i_3 \dots i_N} = \sum_{j=1}^N f_{ji_j}. \quad (35)$$

335 If we are looking at an edge with types  $A_{i_1}^1 A_{i_2}^2 A_{i_3}^3 \dots A_{i_N}^N$  and  $A_{h_1}^1 A_{h_2}^2 A_{h_3}^3 \dots A_{h_N}^N$ , the tran-  
336 sition probability  $T_\gamma^+$  for type  $A_{i_1}^1 A_{i_2}^2 A_{i_3}^3 \dots A_{i_N}^N$  to increase from  $\gamma$  to  $\gamma + 1$  (and type  
337  $A_{h_1}^1 A_{h_2}^2 A_{h_3}^3 \dots A_{h_N}^N$  to be randomly selected for death) is

$$T_\gamma^+ = \frac{\gamma F_{i_1 i_2 i_3 \dots i_N}}{\gamma F_{i_1 i_2 i_3 \dots i_N} + (Z - \gamma) F_{h_1 h_2 h_3 \dots h_N}} \frac{Z - \gamma}{Z}. \quad (36)$$

338 Likewise,  $T_\gamma^-$  will be

$$T_\gamma^- = \frac{(Z - \gamma) F_{h_1 h_2 h_3 \dots h_N}}{\gamma F_{i_1 i_2 i_3 \dots i_N} + (Z - \gamma) F_{h_1 h_2 h_3 \dots h_N}} \frac{\gamma}{Z}. \quad (37)$$

339 So, for a  $A_{i_1}^1 A_{i_2}^2 A_{i_3}^3 \dots A_{i_N}^N$  and  $A_{h_1}^1 A_{h_2}^2 A_{h_3}^3 \dots A_{h_N}^N$  edge, the fixation probability  $\rho_{A_{i_1}^1 A_{i_2}^2 A_{i_3}^3 \dots A_{i_N}^N}$   
340 of type  $A_{i_1}^1 A_{i_2}^2 A_{i_3}^3 \dots A_{i_N}^N$  is

$$\rho_{A_{i_1}^1 A_{i_2}^2 A_{i_3}^3 \dots A_{i_N}^N, A_{h_1}^1 A_{h_2}^2 A_{h_3}^3 \dots A_{h_N}^N} = \frac{1}{1 + \sum_{m=1}^{Z-1} \prod_{\gamma=1}^m \frac{T_\gamma^-}{T_\gamma^+}}. \quad (38)$$

341 **Result I**

342 As  $\frac{T_{\gamma}^{-}}{T_{\gamma}^{+}} = \frac{F_{h_1 h_2 h_3 \dots h_N}}{F_{i_1 i_2 i_3 \dots i_N}}$ , Eq. (38) can be written as

$$\begin{aligned} \rho_{A_{i_1}^1 A_{i_2}^2 A_{i_3}^3 \dots A_{i_N}^N, A_{h_1}^1 A_{h_2}^2 A_{h_3}^3 \dots A_{h_N}^N} &= \frac{1}{1 + \sum_{m=1}^{Z-1} \prod_{\gamma=1}^m \frac{F_{h_1 h_2 h_3 \dots h_N}}{F_{i_1 i_2 i_3 \dots i_N}}} \\ &= \frac{1}{1 + \sum_{m=1}^{Z-1} \prod_{\gamma=1}^m \frac{\sum_{j=1}^N f_{j h_j}}{\sum_{j=1}^N f_{j i_j}}} \quad (39) \\ &= \frac{1}{1 + \sum_{m=1}^{Z-1} \prod_{\gamma=1}^m \left( \frac{N + \sum_{j=1}^N -w_j + w_j \pi_{j h_j}}{N + \sum_{j=1}^N -w_j + w_j \pi_{j i_j}} \right)}. \end{aligned}$$

343 where the fitness is obtained using a linear mapping. In order to further simplify the model,  
344 we consider that all games have the same selection intensity. In this case,

$$\rho_{A_{i_1}^1 A_{i_2}^2 A_{i_3}^3 \dots A_{i_N}^N, A_{h_1}^1 A_{h_2}^2 A_{h_3}^3 \dots A_{h_N}^N} = \frac{1}{1 + \sum_{m=1}^{Z-1} \prod_{\gamma=1}^m \left( \frac{N - w \{N - (\sum_{j=1}^N \pi_{j h_j})\}}{N - w \{N - (\sum_{j=1}^N \pi_{j i_j})\}} \right)}. \quad (40)$$

345 It is worth mentioning here that the assumption of having equal intensities for all games is  
346 strong. Many times, the selection on one game may be more intense than others. These  
347 have to be taken into account as it strengthens the precision of the model and Eq. (39) must  
348 be used in these scenarios. However for the sake of our analysis, we shall assume  $w_j = w$   
349 for all  $j \in [0, N]$ .

350 For weak selection intensity,

$$\begin{aligned} \rho_{A_{i_1}^1 A_{i_2}^2 A_{i_3}^3 \dots A_{i_N}^N, A_{h_1}^1 A_{h_2}^2 A_{h_3}^3 \dots A_{h_N}^N} &\approx \frac{1}{1 + \sum_{m=1}^{Z-1} \prod_{\gamma=1}^m [N - w \{N - (\sum_{j=1}^N \pi_{j h_j})\}] \times [N + w \{N - (\sum_{j=1}^N \pi_{j i_j})\}]} \\ &= \frac{1}{1 + \sum_{m=1}^{Z-1} \prod_{\gamma=1}^m [N^2 - Nw(\sum_{j=1}^N \pi_{j i_j} - \sum_{j=1}^N \pi_{j h_j})]} \\ &= \frac{1}{1 + \sum_{m=1}^{Z-1} \prod_{\gamma=1}^m [N^2 - Nw(\sum_{j=1}^N (\pi_{j i_j} - \pi_{j h_j}))]}. \quad (41) \end{aligned}$$

351 Eq. (41) can be written as

$$\begin{aligned} \rho_{A_{i_1}^1 A_{i_2}^2 A_{i_3}^3 \dots A_{i_N}^N, A_{h_1}^1 A_{h_2}^2 A_{h_3}^3 \dots A_{h_N}^N} &\approx \frac{1}{1 + N^2 \sum_{m=1}^{Z-1} \prod_{\gamma=1}^m [1 - \frac{w}{N} (\sum_{j=1}^N (\pi_{ji_j} - \pi_{jh_j}))]} \\ &= \frac{1}{1 + N^2 [(Z-1) - \frac{w}{N} \sum_{m=1}^{Z-1} \sum_{\gamma=1}^m (\sum_{j=1}^N (\pi_{ji_j} - \pi_{jh_j}))]} \\ &= \frac{1}{1 + ZN^2 - N^2 - wN [\sum_{m=1}^{Z-1} \sum_{\gamma=1}^m (\sum_{j=1}^N (\pi_{ji_j} - \pi_{jh_j}))]} \end{aligned} \quad (42)$$

352 Following Taylor expansion and since  $w \ll 1$ , we get

$$\rho_{A_{i_1}^1 A_{i_2}^2 A_{i_3}^3 \dots A_{i_N}^N, A_{h_1}^1 A_{h_2}^2 A_{h_3}^3 \dots A_{h_N}^N} \approx \underbrace{\frac{1}{1 + ZN^2 - N^2}}_{\text{Under neutrality (w=0)}} + \frac{wN [\sum_{m=1}^{Z-1} \sum_{\gamma=1}^m (\sum_{j=1}^N (\pi_{ji_j} - \pi_{jh_j}))]}{(1 + ZN^2 - N^2)^2}. \quad (43)$$

353 For  $N = 2$  Eq. (41) becomes,

$$\rho_{A_{i_1}^1 A_{i_2}^2, A_{h_1}^1 A_{h_2}^2} \approx \frac{1}{1 + \sum_{m=1}^{Z-1} \prod_{\gamma=1}^m [4 - 2w[(\pi_{1i_1} + \pi_{2i_2}) - (\pi_{1h_1} + \pi_{2h_2})]]}. \quad (44)$$

354 While looking at an edge for which, say, game 2 in both vertices has the same strategy and  
355 thus, we need to only look at differences in one game i.e. only game 1 matters ( $\pi_{2i_2} = \pi_{2h_2}$ ),

$$\rho_{A_{i_1}^1 A_{i_2}^2, A_{h_1}^1 A_{h_2}^2} \approx \frac{1}{1 + \sum_{m=1}^{Z-1} \prod_{\gamma=1}^m [4 - 2w[(\pi_{1i_1} - \pi_{1h_1})]]}. \quad (45)$$

356 For  $N = 1$  in Eq. (43), we can retrieve Eq. (30) for a single multiplayer game i.e.

$$\rho_{A_{i_1}^1, A_{h_1}^1} \approx \underbrace{\frac{1}{Z}}_{\text{Under neutrality}} + \frac{w}{Z^2} \sum_{m=1}^{Z-1} \sum_{\gamma=1}^m (\pi_{1i_1} - \pi_{1h_1}). \quad (46)$$

## 357 Result II

358 If all games have the same intensity, we could also add the payoffs first and then perform the  
359 fitness mappings, then  $F_{i_1 i_2 i_3 \dots i_N} = 1 - w + w \left( \sum_{j=1}^N \pi_{ji_j} \right)$  and  $F_{h_1 h_2 h_3 \dots h_N} = 1 - w +$   
360  $w \left( \sum_{j=1}^N \pi_{jh_j} \right)$ . Thus, the combined fitness (of a vertex) is not just a sum of the fitnesses  
361 of strategies used in the inherent games (in that vertex). The combined fitness is obtained  
362 by summing the average payoffs of playing the respective strategies in the games involved in  
363 a particular vertex and using that to calculate the fitness of that vertex. This combination  
364 of games is not trivial as bringing all the smaller games into one larger game but we cannot  
365 always disintegrate the multi-game back to all the inherent single games.

366 The fixation probability Eq. (38), in this case will be,

$$\rho_{A_{i_1}^1 A_{i_2}^2 A_{i_3}^3 \dots A_{i_N}^N, A_{h_1}^1 A_{h_2}^2 A_{h_3}^3 \dots A_{h_N}^N} = \frac{1}{1 + \sum_{m=1}^{Z-1} \prod_{\gamma=1}^m \left( \frac{1-w+w(\sum_{j=1}^N \pi_{jh_j})}{1-w+w(\sum_{j=1}^N \pi_{ji_j})} \right)}. \quad (47)$$

367 For weak selection intensities,

$$\begin{aligned} \rho_{A_{i_1}^1 A_{i_2}^2 A_{i_3}^3 \dots A_{i_N}^N, A_{h_1}^1 A_{h_2}^2 A_{h_3}^3 \dots A_{h_N}^N} &\approx \frac{1}{1 + \sum_{m=1}^{Z-1} \prod_{\gamma=1}^m \left( 1 - w[1 - (\sum_{j=1}^N \pi_{jh_j})] + w[1 - (\sum_{j=1}^N \pi_{ji_j})] \right)} \\ &= \frac{1}{1 + \sum_{m=1}^{Z-1} \prod_{\gamma=1}^m \left( 1 - w[(\sum_{j=1}^N \pi_{ji_j} - (\sum_{j=1}^N \pi_{jh_j}))] \right)}. \end{aligned} \quad (48)$$

368 If we consider two games, then Eq. (48) will be reduced to

$$\rho_{A_{i_1}^1 A_{i_2}^2, A_{h_1}^1 A_{h_2}^2} \approx \frac{1}{1 + \sum_{m=1}^{Z-1} \prod_{\gamma=1}^m (1 - w[(\pi_{1i_1} + \pi_{2i_2}) - (\pi_{1h_1} + \pi_{2h_2})])}. \quad (49)$$

369 Here, if we look at an edge for which, say, game 2 in both vertices has the same strategy  
370 ( $\pi_{2i_2} = \pi_{2h_2}$ ), then looking at differences in game 1 is what matters. In this scenario,

$$\rho_{A_{i_1}^1 A_{i_2}^2, A_{h_1}^1 A_{h_2}^2} \approx \frac{1}{1 + \sum_{m=1}^{Z-1} \prod_{\gamma=1}^m (1 - w(\pi_{1i_1} - \pi_{1h_1}))}. \quad (50)$$

371 This corresponds to equation Eq. (27) for a single game with two strategies  $i_1$  and  $h_1$ .

## 372 Acknowledgments

373 The authors thank Peter Czuppon and Christoph Hauert for helpful discussions. Generous  
374 funding from the Max Planck Society is gratefully acknowledged.

## 375 References

- 376 Stephen T Abedon, editor. *Bacteriophage ecology: population growth, evolution, and impact*  
377 *of bacterial viruses*. Cambridge University Press, Cambridge, 2008.
- 378 Gergely Boza and Szabolcs Számadó. Beneficial laggards: multilevel selection, cooperative  
379 polymorphism and division of labour in threshold public good games. *BMC Evolutionary*  
380 *Biology*, 10(1):1–12, 2010.
- 381 M. Broom. The use of multiplayer game theory in the modeling of biological populations.  
382 *Comments on Theoretical Biology*, 8:103–123, 2003.

- 383 M. Broom, C. Cannings, and G.T. Vickers. Multi-player matrix games. *Bulletin of Mathe-*  
384 *matical Biology*, 59(5):931–952, 1997.
- 385 R. Cressman, A. Gaunersdorfer, and J. F. Wen. Evolutionary and dynamic stability in sym-  
386 metric evolutionary games with two independent decisions. *International Game Theory*  
387 *Review*, 2(1), 2000.
- 388 Mederic Diard, Victor Garcia, Lisa Maier, Mitja N P Remus-Emsermann, Roland R Regoes,  
389 Martin Ackermann, and Wolf-Dietrich Hardt. Stabilization of cooperative virulence by the  
390 expression of an avirulent phenotype. *Nature*, 494(7437):353–356, 2013.
- 391 S. K. Gazda, R. C. Connor, R. K. Edgar, and F. Cox. A division of labour with role spe-  
392 cialization in group-hunting bottlenose dolphins (*tursiops truncatus*) off cedar key, florida.  
393 *Proceedings of the Royal Society B*, 272:135–140, 2005.
- 394 C. S. Gokhale and A. Traulsen. Evolutionary games in the multiverse. *Proceedings of the*  
395 *National Academy of Sciences USA*, 107:5500–5504, 2010.
- 396 C. S. Gokhale and A. Traulsen. Strategy abundance in evolutionary many-player games with  
397 multiple strategies. *Journal of Theoretical Biology*, 238:180–191, 2011.
- 398 C. S. Gokhale and A. Traulsen. Evolutionary multiplayer games. *Dynamic Games and*  
399 *Applications*, 4:468–488, 2014.
- 400 Katrin Hammerschmidt, Caroline J Rose, Benjamin Kerr, and P B Rainey. Life cycles, fitness  
401 decoupling and the evolution of multicellularity. *Nature*, 515(7525):75–79, 2014.
- 402 T. A. Han, A. Traulsen, and C. S. Gokhale. On equilibrium properties of evolutionary multi-  
403 player games with random payoff matrices. *Theoretical Population Biology*, 81:264–72,  
404 2012.
- 405 Koh Hashimoto. Unpredictability induced by unfocused games in evolutionary game dynam-  
406 ics. *Journal of Theoretical Biology*, 241(3):669–675, 2006.
- 407 C. Hauert, A. Traulsen, H. Brandt, M. A. Nowak, and K. Sigmund. Via freedom to coercion:  
408 the emergence of costly punishment. *Science*, 316:1905–1907, 2007.
- 409 R. Heinsohn and G. Parker. Complex cooperative strategies in group-territorial african lions.  
410 *Science*, 269:1260–1262, 1995.
- 411 J. Hofbauer and K. Sigmund. *Evolutionary Games and Population Dynamics*. Cambridge  
412 University Press, Cambridge, UK, 1998.
- 413 B. Kerr, M. A. Riley, M. W. Feldman, and B. J. M. Bohannan. Local dispersal promotes  
414 biodiversity in a real-life game of rock-paper-scissors. *Nature*, 418(6894):171–174, 2002.
- 415 Natalia L Komarova. Replicator-mutator equation, universality property and population  
416 dynamics of learning. *Journal of Theoretical Biology*, 230(2):227–239, 2004.

- 417 S. Legge. Cooperative lions escape the prisoner's dilemma. *Trends in Ecology and Evolution*,  
418 11(1):2–3, 1995.
- 419 Xiang-Yi Li, Cleo Pietschke, Sebastian Fraune, Philipp M. Altrrock, Thomas C. G. Bosch,  
420 and Arne Traulsen. Which games are growing bacterial populations playing? *Journal of*  
421 *The Royal Society Interface*, 12:108, 2015. ISSN 1742-5689. doi: 10.1098/rsif.2015.0121.
- 422 J. Maynard Smith. *Evolution and the Theory of Games*. Cambridge University Press, Cam-  
423 bridge, 1982.
- 424 J. Maynard Smith and G. R. Price. The logic of animal conflict. *Nature*, 246:15–18, 1973.
- 425 M. Milinski, D. Semmann, H.-J. Krambeck, and M. Marotzke. Stabilizing the Earth's climate  
426 is not a losing game: Supporting evidence from public goods experiments. *Proceedings of*  
427 *the National Academy of Sciences USA*, 103:3994–3998, 2006.
- 428 M. A. Nowak. *Evolutionary dynamics*. Harvard University Press, Cambridge MA, 2006.
- 429 M. A. Nowak and R. M. May. Evolutionary games and spatial chaos. *Nature*, 359:826–829,  
430 1992.
- 431 M. A. Nowak and K. Sigmund. Evolutionary dynamics of biological games. *Science*, 303:  
432 793–799, 2004.
- 433 M. A. Nowak, A. Sasaki, C. Taylor, and D. Fudenberg. Emergence of cooperation and  
434 evolutionary stability in finite populations. *Nature*, 428:646–650, 2004.
- 435 E. Ostrom. *Governing the commons: The evolution of institutions for collective action*.  
436 Cambridge Univ. Press, 1990.
- 437 Elinor Ostrom. Collective action and the evolution of social norms. *Journal of Economic*  
438 *Theory*, 14(3):137–158, 2000.
- 439 J. M. Pacheco, F. C. Santos, M. O. Souza, and B. Skyrms. Evolutionary dynamics of  
440 collective action in n-person stag hunt dilemmas. *Proceedings of the Royal Society B*,  
441 276:315–321, 2009.
- 442 J. Peña. Group size diversity in public goods games. *Evolution*, 66:623–636, 2012.
- 443 C. Rueffler, Joachim Hermisson, and Günther P. Wagner. Evolution of functional specializa-  
444 tion and division of labour. *Proceedings of the National Academy of Sciences USA*, 109:  
445 E326–E335, 2012.
- 446 P. Schuster and K. Sigmund. Replicator dynamics. *Journal of Theoretical Biology*, 100:  
447 533–538, 1983.
- 448 C. E. Tarnita, T. Antal, H. Ohtsuki, and M. A. Nowak. Evolutionary dynamics in set  
449 structured populations. *Proceedings of the National Academy of Sciences USA*, 106:  
450 8601–8604, 2009.



- 451 A. Traulsen and C. Hauert. Stochastic evolutionary game dynamics. In Heinz Georg Schuster,  
452 editor, *Reviews of Nonlinear Dynamics and Complexity*, volume II, pages 25–61. Wiley-  
453 VCH, Weinheim, 2009.
- 454 A. Traulsen and F. A. Reed. From genes to games: Cooperation and cyclic dominance in  
455 meiotic drive. *Journal of Theoretical Biology*, 299:120–125, 2012.
- 456 A. Traulsen, N. Shores, and M. A. Nowak. Analytical results for individual and group  
457 selection of any intensity. *Bulletin of Mathematical Biology*, 70:1410–1424, 2008.
- 458 J. von Neumann and O. Morgenstern. *Theory of Games and Economic Behavior*. Princeton  
459 University Press, Princeton, 1944.
- 460 L. M. Wahl. Evolving the division of labour: generalists, specialists and task allocation.  
461 *Journal of Theoretical Biology*, 219:371–388, 2002.
- 462 J. Y. Wakano, M. A. Nowak, and C. Hauert. Spatial dynamics of ecological public goods.  
463 *Proceedings of the National Academy of Sciences USA*, 106:7910–7914, 2009.
- 464 C. Wedekind and M. Milinski. Human cooperation in the simultaneous and the alternat-  
465 ing prisoner’s dilemma: Pavlov versus generous tit-for-tat. *Proceedings of the National  
466 Academy of Sciences USA*, 93(7):2686–2689, 1996.
- 467 B. Wu, D. Zhou, and L. Wang. Evolutionary dynamics on stochastic evolving networks for  
468 multiple-strategy games. *Physical Review E*, 84(046111), 2011.
